# Supplementary material for: Mesoporous TiO2/Zn2Ti3O8 hybrid films synthesized by polymeric micelle assembly
Source: Royal Society of Chemistry journal article supplement (doi:10.1039/c5cc04903b), 2015-01-01
Supplement: c5cc04903b1.pdf [file c5cc04903b1.pdf]

## Mesoporous TiO<sub>2</sub>/Zn<sub>2</sub>Ti<sub>3</sub>O<sub>8</sub> Hybrid Films by Polymeric Micelle Assembly

### Experimental Section

#### Materials

The poly(styrene-2-vinylpyridine-ethylene oxide) (PS<sub>(14500)</sub>-PVP<sub>(20000)</sub>-PEO<sub>(33000)</sub>) triblock copolymer with polydispersity index 1.15 (the numbers in the parentheses indicate the molecular weights of each block) was purchased from Polymer Source. Tetrahydrofuran (THF, Wako), hydrochloric acid (HCl, Nacalai), titanium tetraisopropoxide (TTIP, Wako) and zinc nitrate (Zn(NO<sub>3</sub>)<sub>2</sub>, Wako) were used without further purification.

#### Characterization

The hydrodynamic diameter of the polymeric micelles was measured using the dynamic light scattering measurement (DLS, Otsuka ELSZ particle and zeta-potential analyzer). The crystalline phases were investigated by thin film X-ray diffractometer (XRD, Shimadzu XRD-7000). The thermal stability of the micelles composites was tested by thermogravimetric analysis (SEIKO-6300 TG/DTA instruments). The morphology of the mesoporous films was observed under field-emission scanning electron microscope (SEM, Hitachi SU-8000) and transmission electron microscope (TEM, JEOL JEM-1210).

#### Photocatalytic testing

The photocatalytic H<sub>2</sub> evolution test was investigated in a glass reactor (220 mL) with a closed gas circulation and evacuation system. 300 W UV-enhanced Xe lamp light source was used. TiO<sub>2</sub>/Zn<sub>2</sub>Ti<sub>3</sub>O<sub>8</sub> mesoporous thin films on the quartz substrate (2.0×2.0 cm) were placed in the bottom of the glass reactor contained aqueous methanol solution (10 mL methanol in 50 mL H<sub>2</sub>O). The evolution of H<sub>2</sub> gas was analyzed with an online gas chromatography (GC-8A, Shimadzu) with a thermal conductivity detector.

Fig. S1

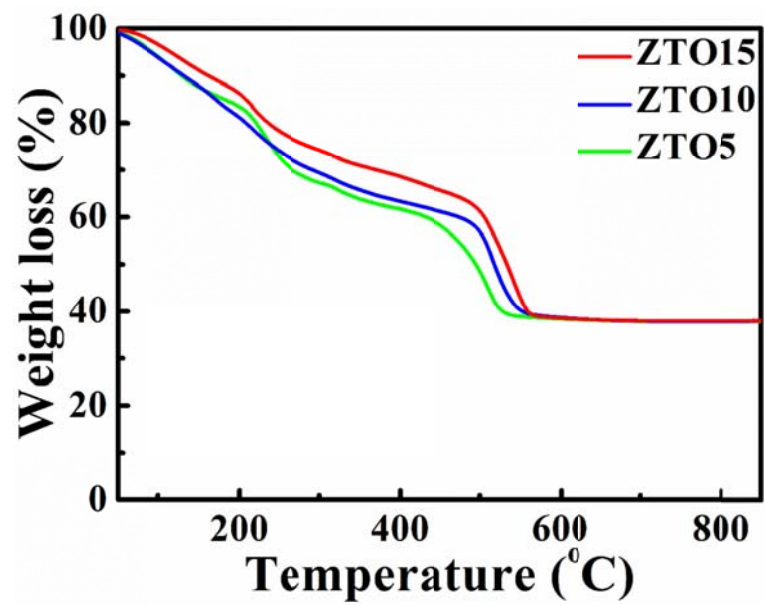

Fig. S1 The thermogravimetric analysis (TGA) of  $\text{TiO}_2/\text{Zn}_2\text{Ti}_3\text{O}_8/\text{PS-PVP-PEO}$  composite micelles.

**Fig. S2**

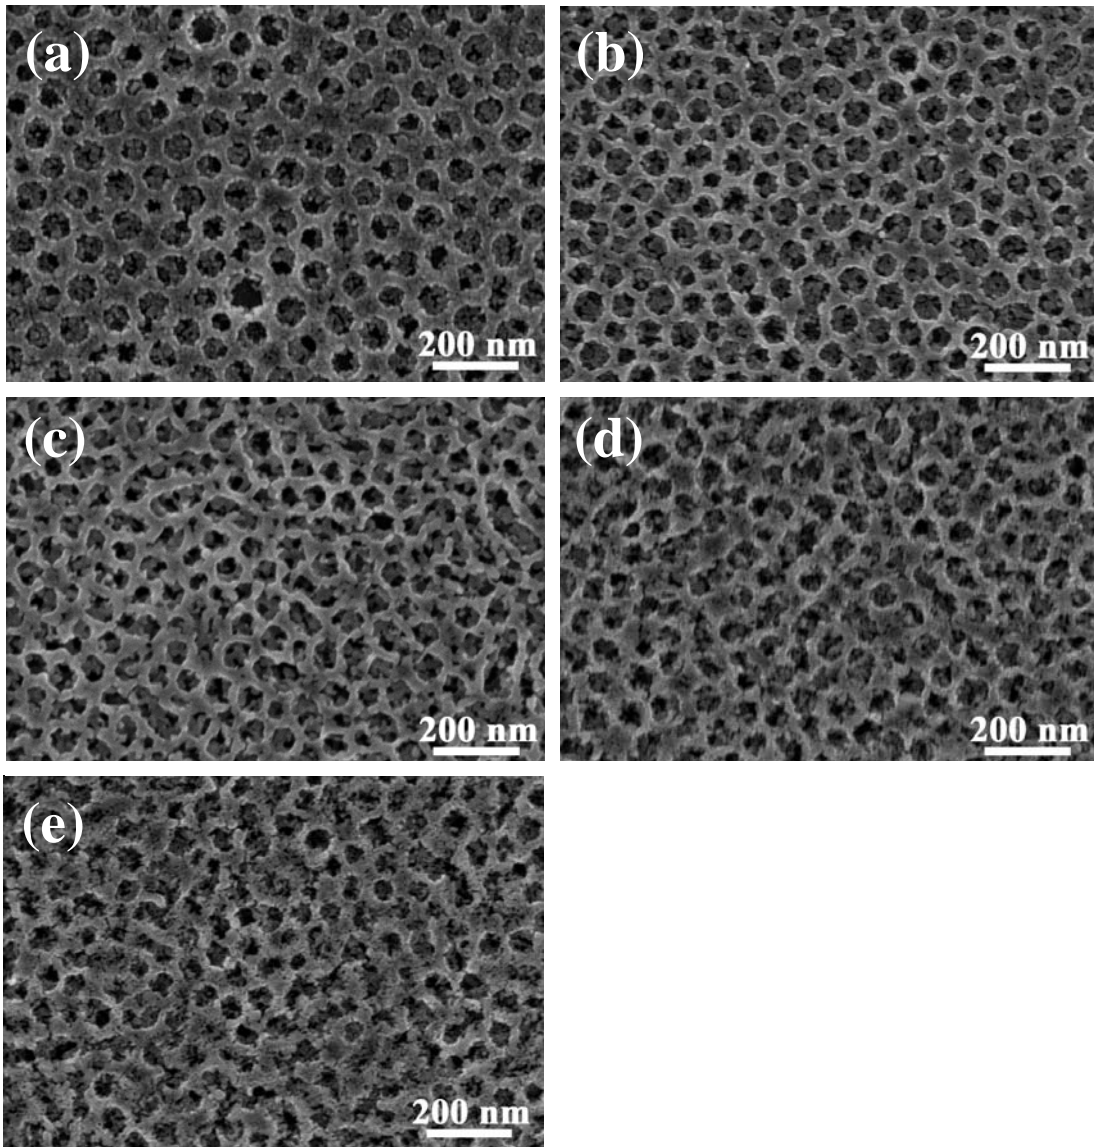

**Fig. S2** The SEM images of mesoporous films of various phase compositions calcined at 550 °C (a) ZTO0, (b) ZTO5, (c) ZTO10, (d) ZTO15, and (e) ZTO20.

**Fig. S3**

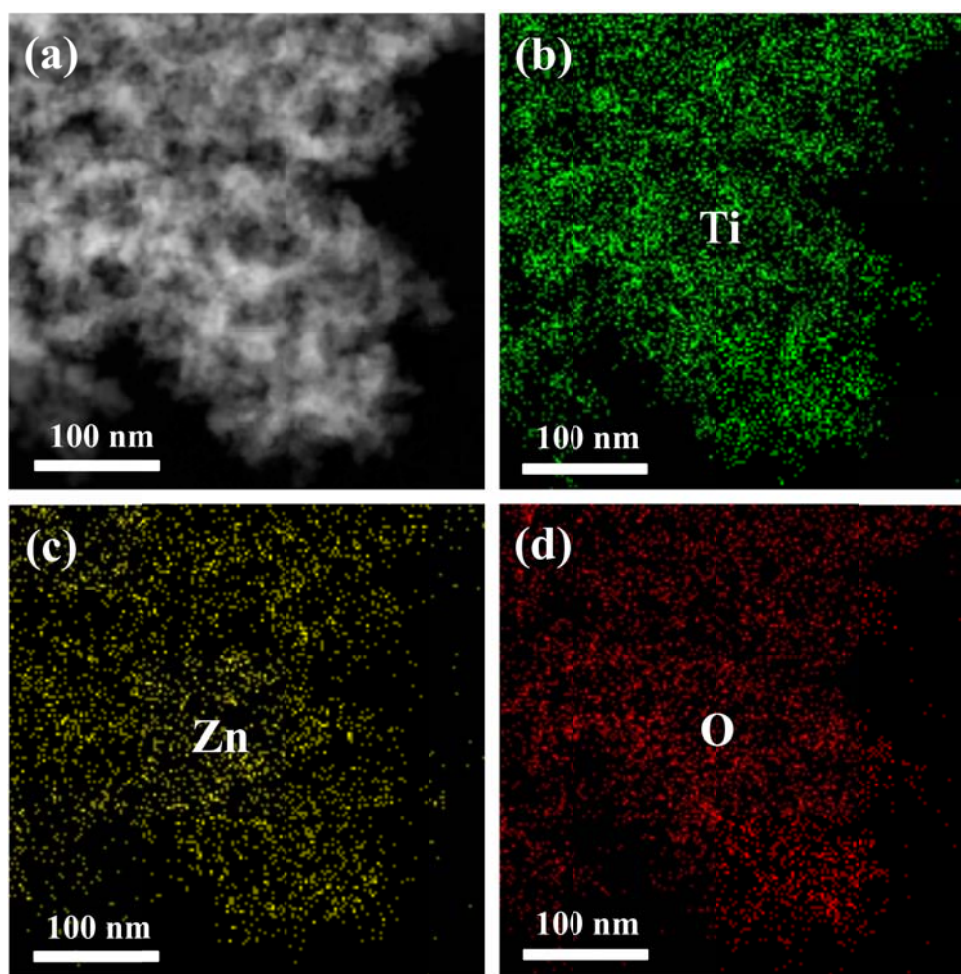

**Fig. S3** (a) HAADF-STEM image and nanoscale elemental mapping of b) Ti and c) Zn, and d) O of mesoporous film of ZTO15.

Fig. S4

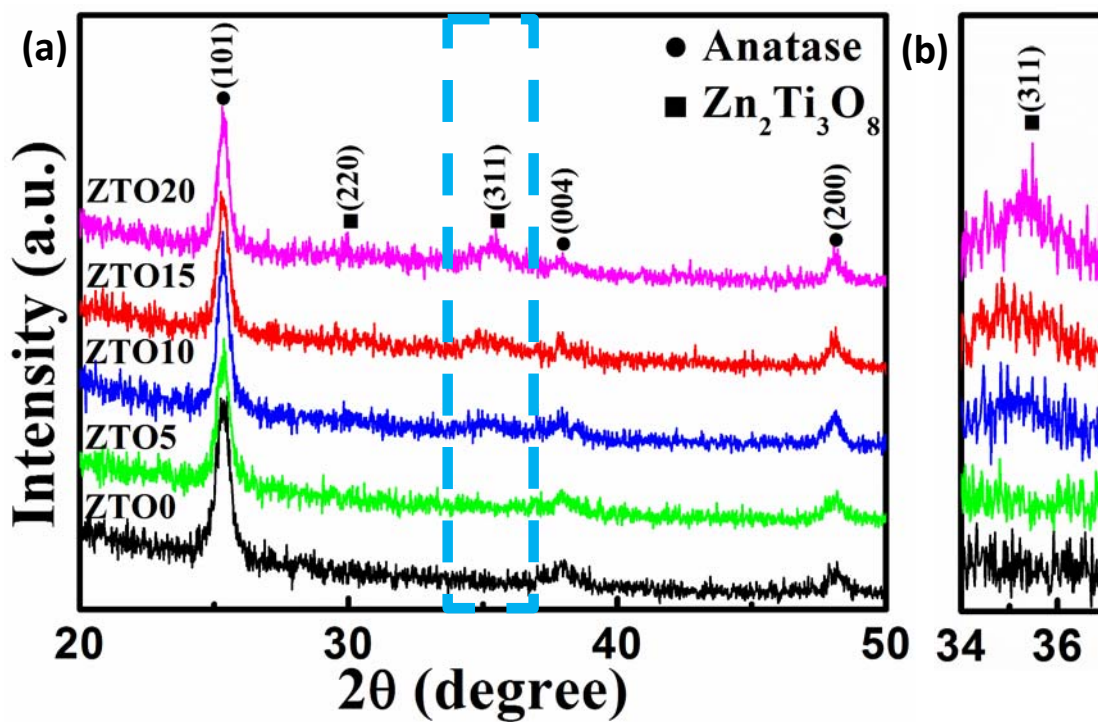

Fig. S4 The XRD patterns of  $\text{TiO}_2/\text{Zn}_2\text{Ti}_3\text{O}_8$  mesoporous thin films. The enlarge (311) peak is shown in (b)

Table S1. Phase compositions and  $\text{H}_2$  evolution rate of different mesoporous films.

| Samples | $\text{TiO}_2$ (%) | $\text{Zn}_2\text{Ti}_3\text{O}_8$ (%) | $k(\text{H}_2)$ ( $\mu\text{mol}\cdot\text{h}^{-1}$ ) |
|---------|--------------------|----------------------------------------|-------------------------------------------------------|
| ZTO0    | 100                | 0                                      | 6.78                                                  |
| ZTO5    | 93.9               | 6.1                                    | 7.91                                                  |
| ZTO10   | 89.2               | 10.8                                   | 8.45                                                  |
| ZTO15   | 86.0               | 14.0                                   | 10.16                                                 |
| ZTO20   | 79.3               | 20.7                                   | 7.54                                                  |

Fig. S5

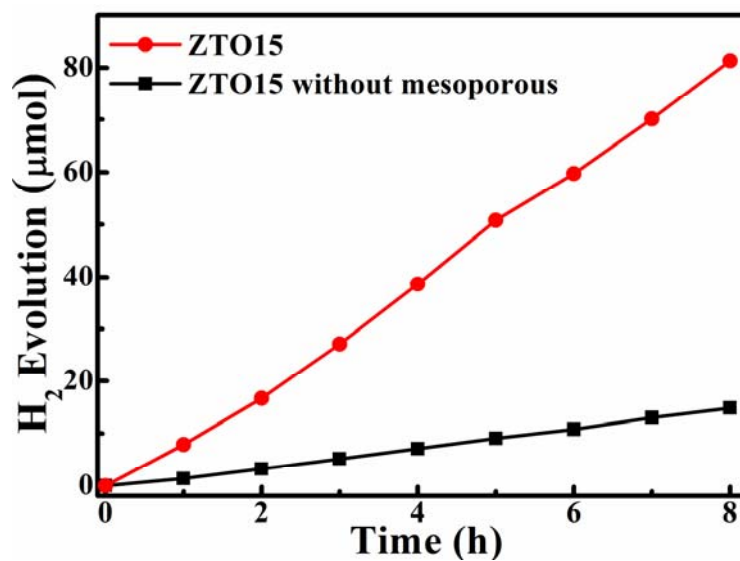

**Fig. S5** Comparison of photocatalytic activity for H<sub>2</sub> evolution of ZTO15 and TiO<sub>2</sub>/Zn<sub>2</sub>Ti<sub>3</sub>O<sub>8</sub> composites, TiO<sub>2</sub>/Zn<sub>2</sub>Ti<sub>3</sub>O<sub>8</sub> composites without mesoporous was synthesized in the absence of block copolymer.
